# Supplementary material for: Deficiency of Adipose Aryl Hydrocarbon Receptor Protects against Diet-Induced Metabolic Dysfunction through Sexually Dimorphic Mechanisms
Source: Cells. 2023 Jun 29;12(13):1748. doi: 10.3390/cells12131748 (PMC10340611; doi:10.3390/cells12131748)
Supplement: Supplementary file 1 [file cells-12-01748-s001.zip]

Archive with 12 entries (12 files):
- Figure S1.jpg
- Figure S2.jpg
- Figure S3.jpg
- Figure S4.jpg
- Figure S5.jpg
- Figure S6.jpg
- Figure S7.jpg
- Figure S8.jpg
- Figure S9.jpg
- supplementary figlegends.pdf
- Table S1.jpg
- Table S2.jpg
